# Supplementary material
Source: Springer Nature journal article supplement (https://www.springermedizin.de/resource/supplementary/12905_2013_392_MOESM3_ESM.pdf/9518666)

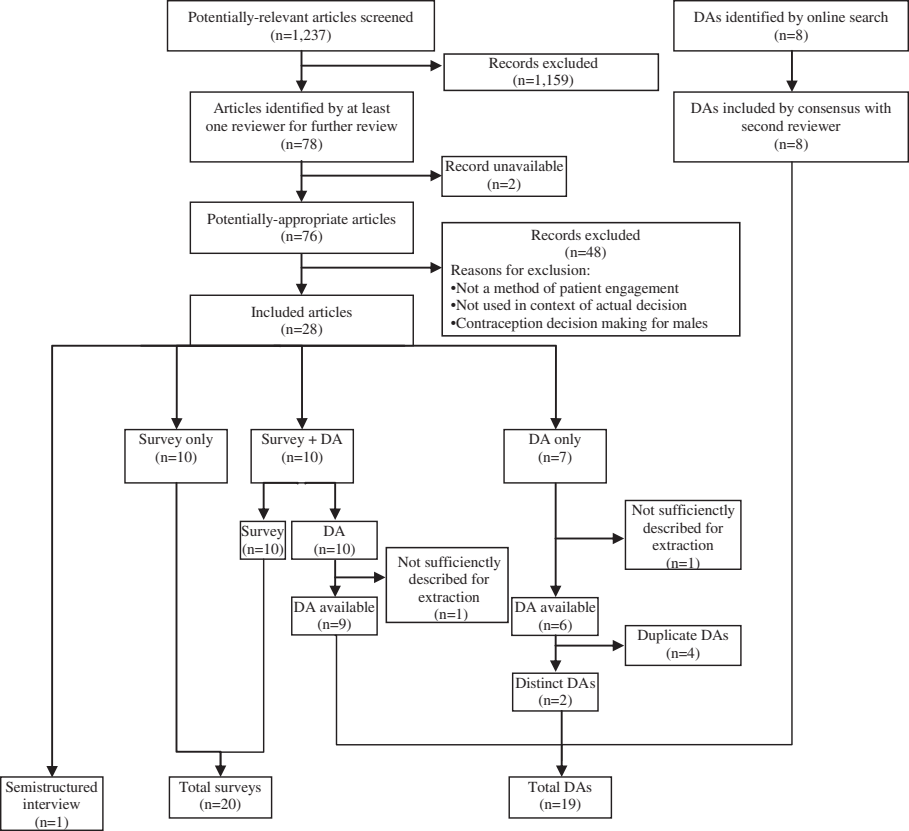

Supplement: MOESM3 [file 9518666]
